# Supplementary material for: Evaluation of cytotoxic potential of structurally well-characterized RNA targeted ionic non-steroidal anti-inflammatory (NSAID) Cu(ii) & Zn(ii) DACH–mefenamato drug conjugates against human cancer cell lines
Source: Royal Society of Chemistry journal article supplement (doi:10.1039/c9ra07464c), 2019-12-24
Supplement: c9ra07464c1.pdf [file c9ra07464c1.pdf]

## Supplementary material

### Evaluation of cytotoxic potential of structurally well-characterized RNA targeted Ionic Non-steroidal anti-inflammatory (NSAID) Cu(II) & Zn(II) DACH-mefenamato drug conjugates against human cancer cell lines.

HuzaiFaYasir Khan, Sartaj Tabassum and Farukh Arjmand\*

*Department of Chemistry, Aligarh Muslim University, Aligarh 202002, Uttar Pradesh, India*

*\*Corresponding author E-mail: farukh.arjmand18@gmail.com*

**Table S1**

Selected bond lengths for **1**

| Atom | Atom | Length/Å  | Atom | Atom | Length/Å  |
|------|------|-----------|------|------|-----------|
| Cu1  | N3   | 2.018 (3) | C37  | C36  | 1.389 (6) |
| Cu1  | N1   | 2.019 (3) | C37  | C38  | 1.376 (7) |
| Cu1  | N4   | 2.019 (3) | C24  | C23  | 1.393 (7) |
| Cu1  | N2   | 2.005 (3) | C24  | C27  | 1.506 (7) |
| O2   | C13  | 1.266 (5) | C18  | C17  | 1.378 (6) |
| N3   | C7   | 1.483 (6) | C16  | C17  | 1.382 (7) |
| O1   | C13  | 1.260 (5) | C41  | C40  | 1.513 (6) |
| C29  | C34  | 1.414 (6) | C22  | C23  | 1.380 (7) |
| C29  | C30  | 1.396 (6) | C31  | C32  | 1.388 (6) |
| C29  | C28  | 1.508 (6) | C35  | C36  | 1.382 (6) |
| N5   | C19  | 1.387 (6) | C35  | C40  | 1.397 (6) |
| N5   | C20  | 1.417 (5) | C33  | C32  | 1.379 (6) |
| N1   | C1   | 1.475 (6) | C11  | C10  | 1.534 (6) |
| N4   | C12  | 1.495 (6) | C11  | C12  | 1.496 (6) |
| N6   | C34  | 1.376 (5) | C38  | C39  | 1.388 (7) |
| N6   | C35  | 1.426 (5) | C39  | C42  | 1.506 (6) |
| N2   | C6   | 1.462 (6) | C39  | C40  | 1.403 (6) |
| C14  | C19  | 1.420 (6) | C8   | C9   | 1.540 (7) |
| C14  | C15  | 1.391 (6) | C8   | C7   | 1.541 (6) |
| C14  | C13  | 1.510 (6) | C9   | C10  | 1.464 (7) |
| C19  | C18  | 1.397 (6) | C5   | C6   | 1.507 (6) |
| C25  | C20  | 1.403 (6) | C5   | C4   | 1.505 (7) |
| C25  | C24  | 1.404 (6) | C12  | C7   | 1.465 (7) |

|     |     |           |    |     |           |
|-----|-----|-----------|----|-----|-----------|
| C25 | C26 | 1.504 (6) | C2 | C3  | 1.526 (8) |
| C34 | C33 | 1.405 (6) | C2 | C1  | 1.515 (7) |
| C15 | C16 | 1.378 (6) | C3 | C4  | 1.301 (9) |
| C30 | C31 | 1.377 (6) | C6 | C1  | 1.303 (9) |
| C20 | C21 | 1.399 (6) | O5 | C28 | 1.258 (5) |
| C21 | C22 | 1.384 (6) | O6 | C28 | 1.265 (5) |

**Table S2**

**Bond Angles for Complex 1**

| <b>Atom Atom Atom</b> | <b>Angle/°</b> | <b>Atom Atom Atom</b> | <b>Angle/°</b> |
|-----------------------|----------------|-----------------------|----------------|
| N1 Cu1 N3             | 93.53 (13)     | C36 C35 N6            | 119.0 (4)      |
| N4 Cu1 N3             | 85.13 (13)     | C40 C35 N6            | 120.3 (4)      |
| N4 Cu1 N1             | 175.91 (15)    | C40 C35 C36           | 120.7 (4)      |
| N2 Cu1 N3             | 176.69 (14)    | C35 C36 C37           | 120.2 (4)      |
| N2 Cu1 N1             | 83.99 (13)     | C32 C33 C34           | 121.2 (4)      |
| N2 Cu1 N4             | 97.19 (13)     | C12 C11 C10           | 111.4 (4)      |
| C7 N3 Cu1             | 106.8 (3)      | C22 C23 C24           | 121.3 (4)      |
| C30 C29 C34           | 118.1 (4)      | C39 C38 C37           | 121.6 (4)      |
| C28 C29 C34           | 122.8 (4)      | C42 C39 C38           | 120.4 (4)      |
| C28 C29 C30           | 119.1 (4)      | C40 C39 C38           | 119.2 (4)      |
| C20 N5 C19            | 126.7 (4)      | C40 C39 C42           | 120.5 (4)      |
| C1 N1 Cu1             | 108.7 (3)      | O1 C13 O2             | 124.2 (4)      |
| C12 N4 Cu1            | 107.7 (3)      | C14 C13 O2            | 119.4 (4)      |
| C35 N6 C34            | 122.8 (4)      | C14 C13 O1            | 116.5 (4)      |
| C6 N2 Cu1             | 108.9 (3)      | C33 C32 C31           | 120.4 (4)      |
| C15 C14 C19           | 119.0 (4)      | C35 C40 C41           | 121.0 (4)      |
| C13 C14 C19           | 123.1 (4)      | C39 C40 C41           | 120.0 (4)      |
| C13 C14 C15           | 117.8 (4)      | C39 C40 C35           | 119.0 (4)      |
| C14 C19 N5            | 119.9 (4)      | C16 C17 C18           | 120.9 (4)      |
| C18 C19 N5            | 121.8 (4)      | C7 C8 C9              | 108.5 (4)      |
| C18 C19 C14           | 118.3 (4)      | C10 C9 C8             | 110.6 (5)      |
| C24 C25 C20           | 118.9 (4)      | C4 C5 C6              | 111.9 (4)      |
| C26 C25 C20           | 119.2 (4)      | C9 C10 C11            | 112.5 (4)      |
| C26 C25 C24           | 121.8 (4)      | C11 C12 N4            | 114.3 (4)      |
| N6 C34 C29            | 120.9 (4)      | C7 C12 N4             | 108.0 (4)      |
| C33 C34 C29           | 118.8 (4)      | C7 C12 C11            | 114.7 (4)      |
| C33 C34 N6            | 120.2 (4)      | C1 C2 C3              | 110.5 (5)      |
| C16 C15 C14           | 121.8 (4)      | C8 C7 N3              | 112.8 (4)      |
| C31 C30 C29           | 122.8 (4)      | C12 C7 N3             | 108.8 (4)      |
| C25 C20 N5            | 118.4 (4)      | C12 C7 C8             | 112.6 (4)      |

|     |     |     |           |    |     |     |           |
|-----|-----|-----|-----------|----|-----|-----|-----------|
| C21 | C20 | N5  | 120.9 (4) | C4 | C3  | C2  | 121.0 (6) |
| C21 | C20 | C25 | 120.6 (4) | C5 | C6  | N2  | 116.5 (4) |
| C22 | C21 | C20 | 119.7 (4) | C1 | C6  | N2  | 117.2 (6) |
| C38 | C37 | C36 | 119.3 (4) | C1 | C6  | C5  | 119.8 (6) |
| C23 | C24 | C25 | 119.4 (4) | C2 | C1  | N1  | 114.7 (5) |
| C27 | C24 | C25 | 121.3 (4) | C6 | C1  | N1  | 116.1 (5) |
| C27 | C24 | C23 | 119.3 (4) | C6 | C1  | C2  | 120.9 (6) |
| C17 | C18 | C19 | 120.9 (4) | C3 | C4  | C5  | 121.3 (6) |
| C17 | C16 | C15 | 118.9 (4) | O5 | C28 | C29 | 120.1 (3) |
| C23 | C22 | C21 | 120.0 (4) | O6 | C28 | C29 | 116.8 (4) |
| C32 | C31 | C30 | 118.8 (4) | O6 | C28 | O5  | 123.1 (4) |

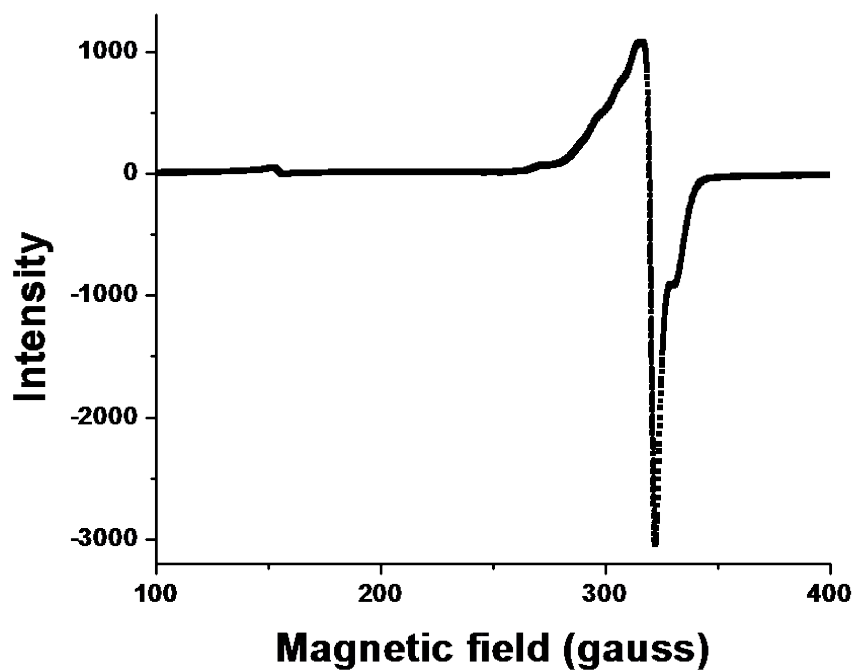

Fig. S1 EPR spectrum of complex 1

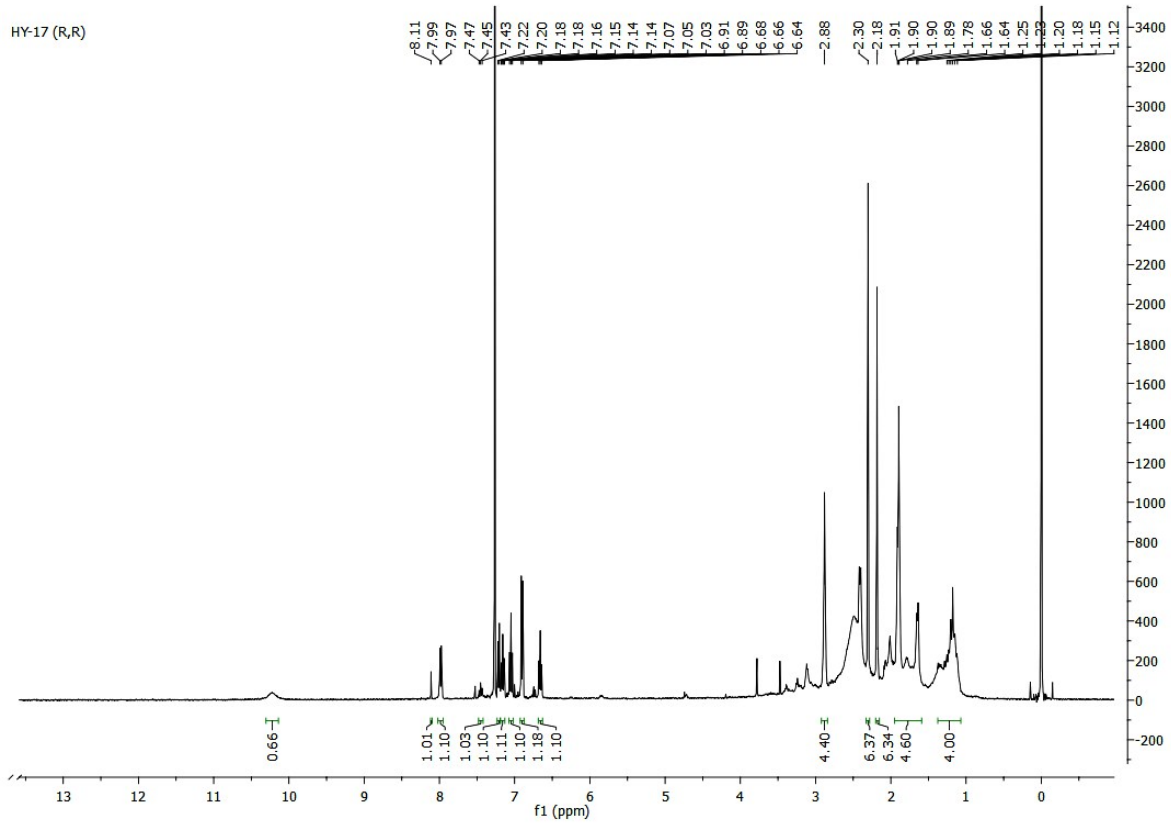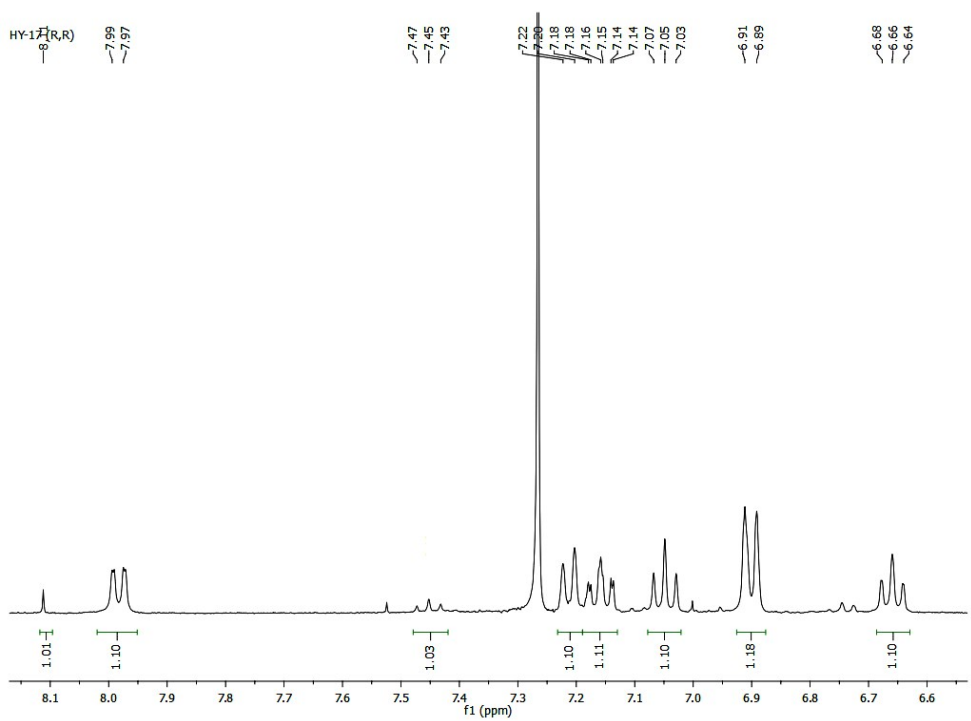

Fig. S2  $^1\text{H}$  NMR spectrum of complex **2**

HY-17 (R,R)

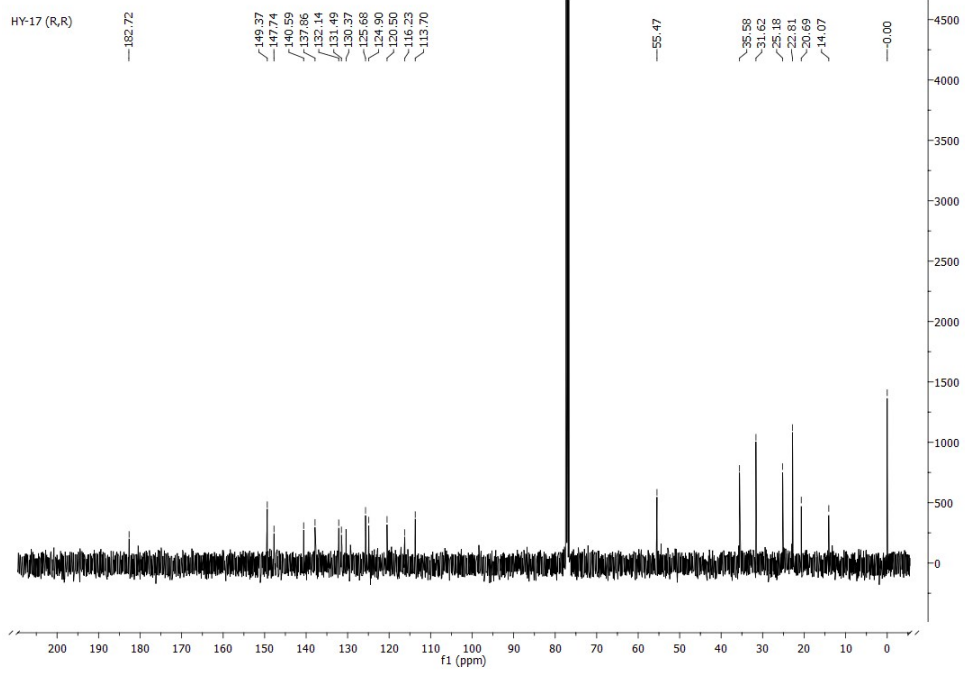

Nov07-2017  
HY-17 (R,R)

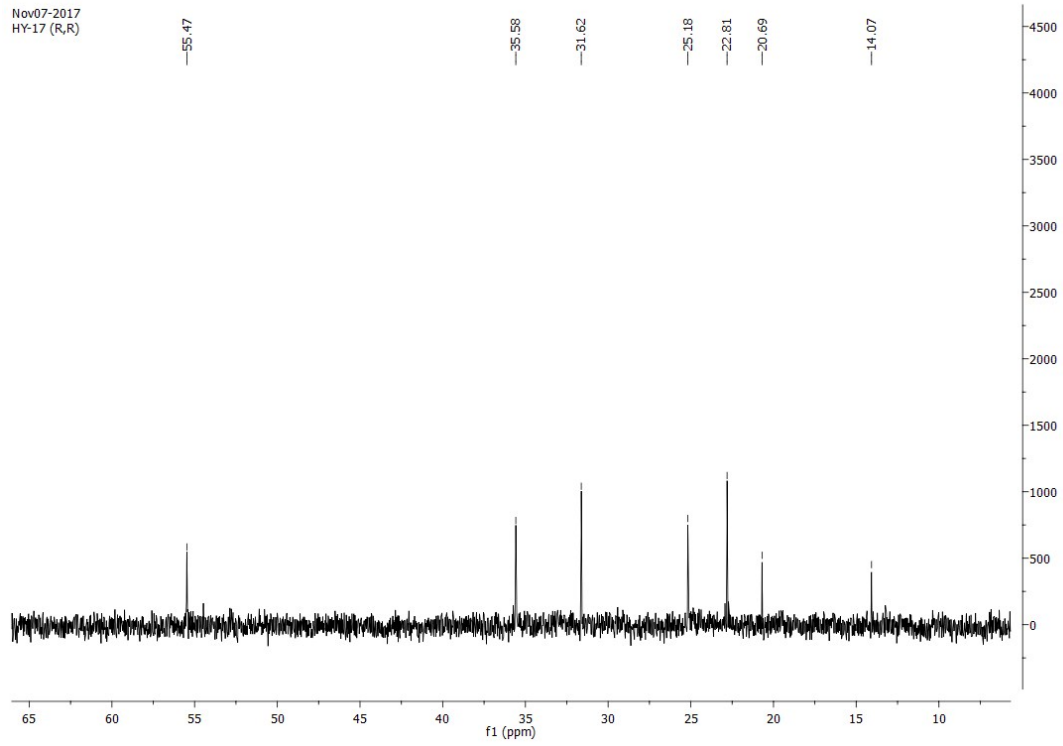

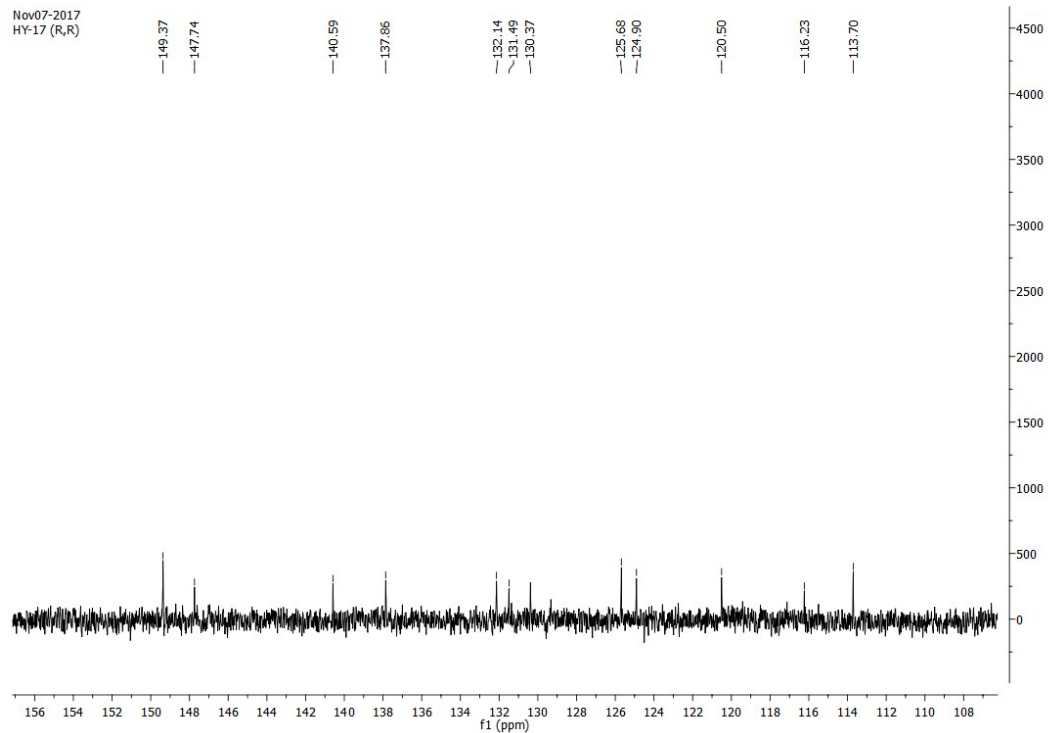

**Fig. S3**  $^{13}\text{C}$  NMR spectrum of complex 2

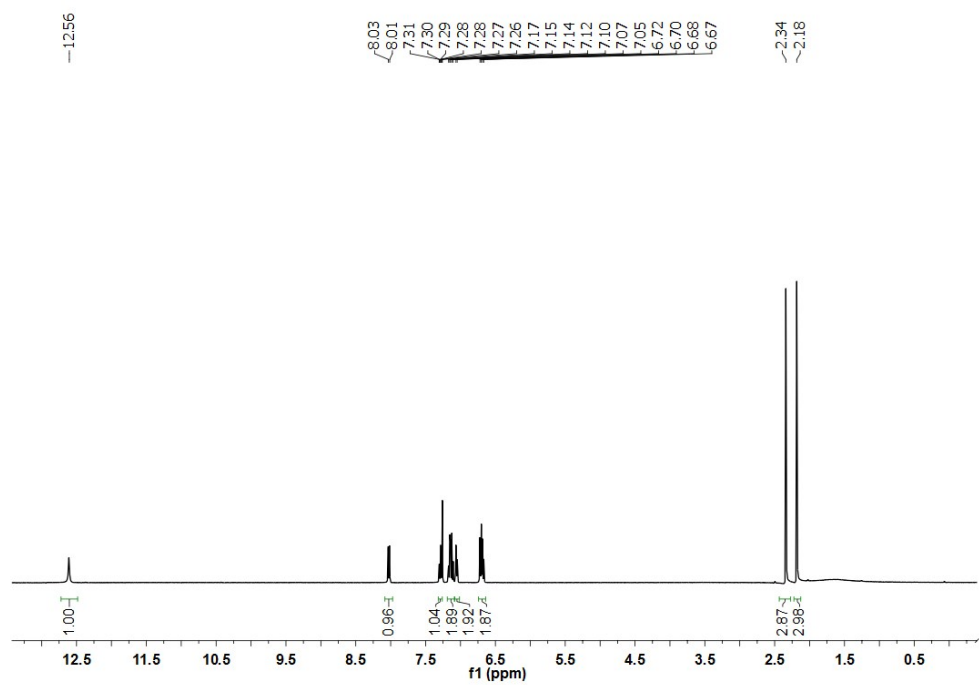

**Fig. S4**  $^1\text{H}$ NMR spectrum of Mefenamic acid

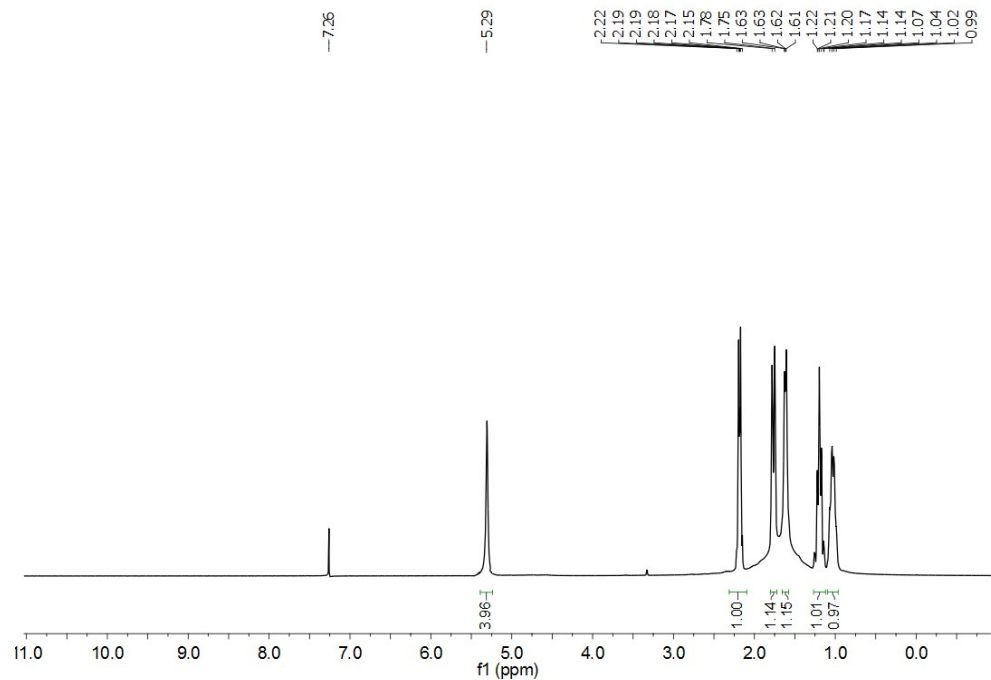

Fig. S5 (a)  $^1\text{H}$ NMR spectrum of DACH

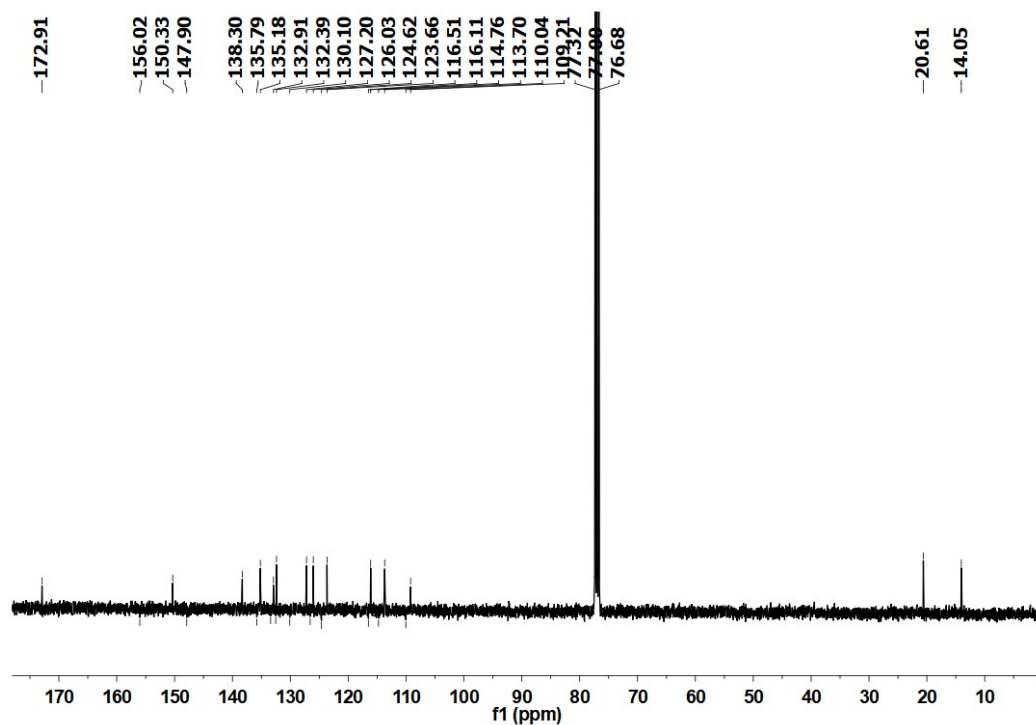

Fig. S5 (b)  $^{13}\text{C}$  NMR spectrum of free mefenamic acid

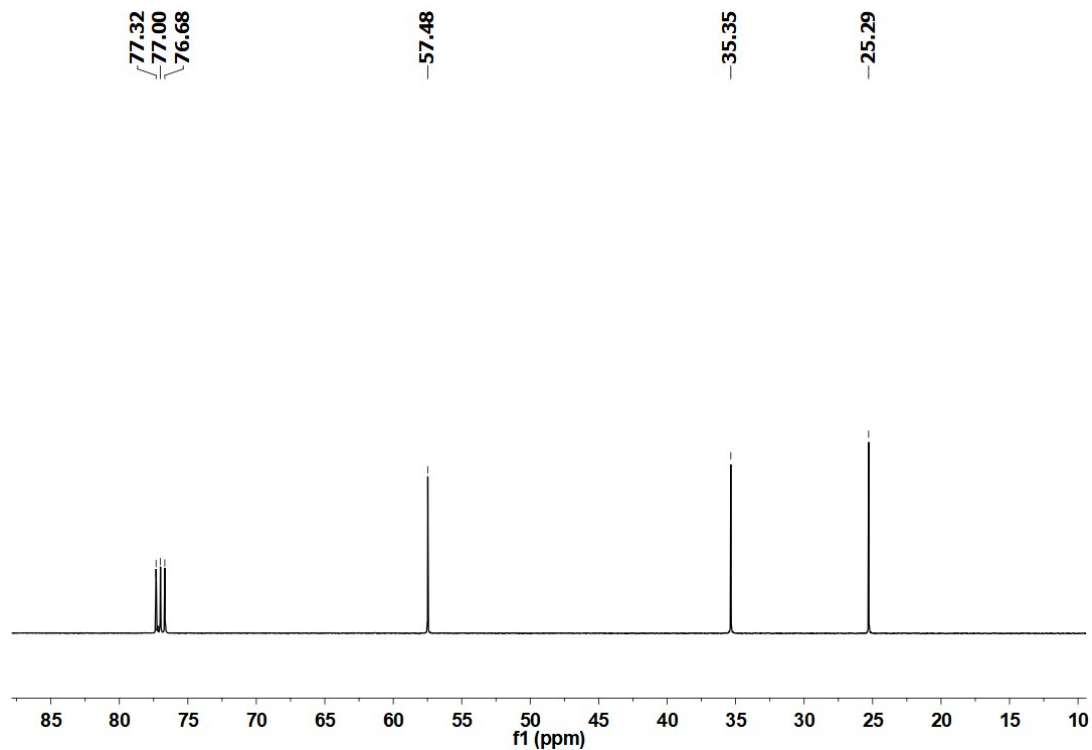

Fig. S5 (c)  $^{13}\text{C}$  NMR spectrum of free DACH

|               |         |             |        |                 |        |                        |                      |
|---------------|---------|-------------|--------|-----------------|--------|------------------------|----------------------|
| Sample Name   | HY-16   | Position    | Vial 1 | Instrument Name | QTOF   | User Name              |                      |
| Inj Vol       | -1      | InjPosition |        | SampleType      | Sample | IRM Calibration Status | Success              |
| Data Filename | HY-16.d | ACQ Method  |        | Comment         |        | Acquired Time          | 6/7/2018 11:00:02 AM |

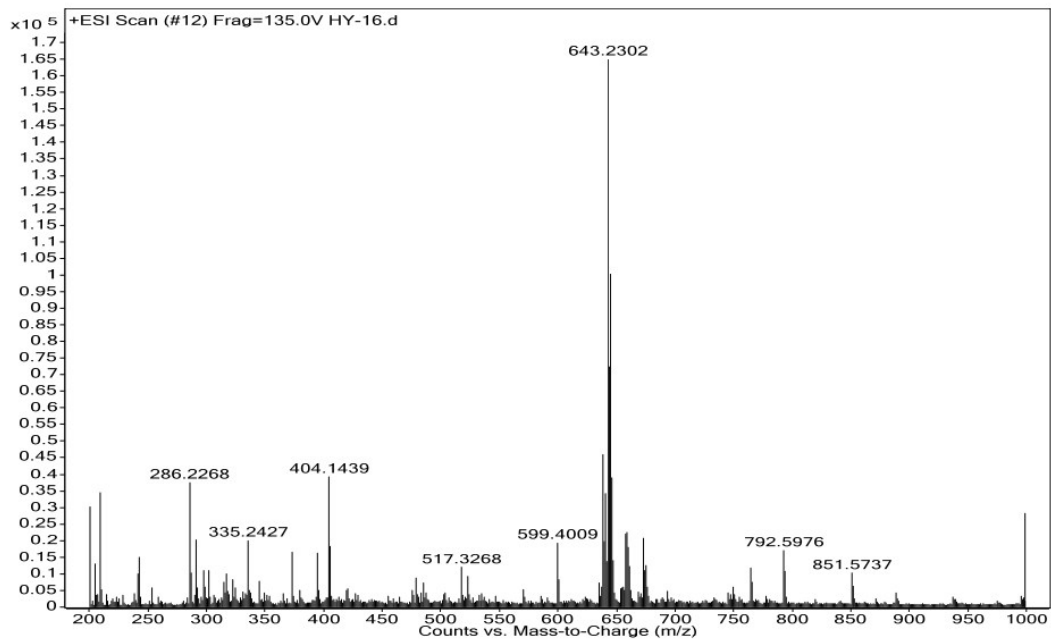

Fig. S6 ESI-MS spectrum of complex 1.



|               |         |             |        |                 |        |                        |                      |
|---------------|---------|-------------|--------|-----------------|--------|------------------------|----------------------|
| Sample Name   | HY-17   | Position    | Vial 1 | Instrument Name | QTOF   | User Name              |                      |
| Inj Vol       | -1      | InjPosition |        | SampleType      | Sample | IRM Calibration Status | Success              |
| Data Filename | HY-17.d | ACQ Method  |        | Comment         |        | Acquired Time          | 6/7/2018 11:01:59 AM |

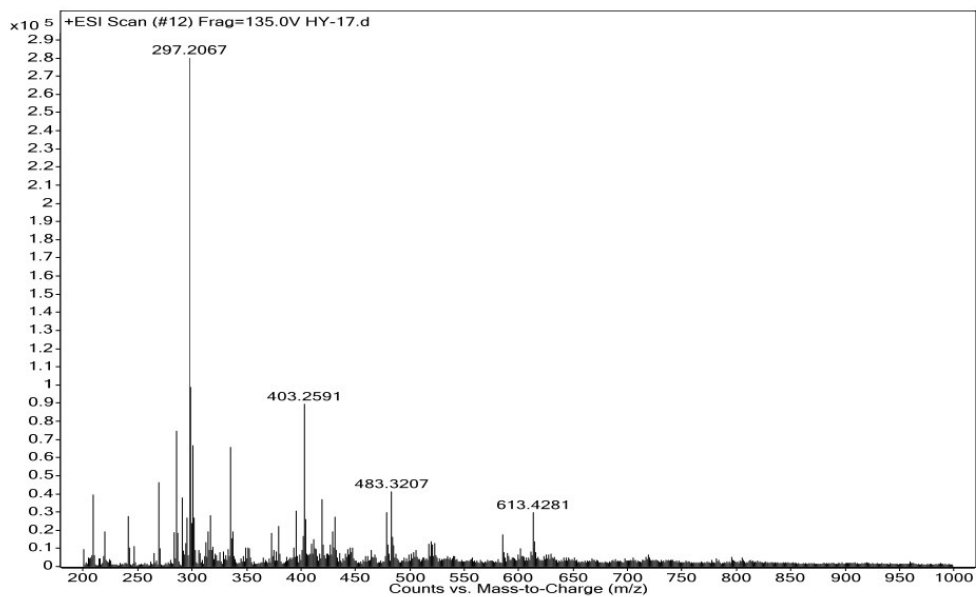

Fig. S7 ESI-MS spectrum of complex 2.

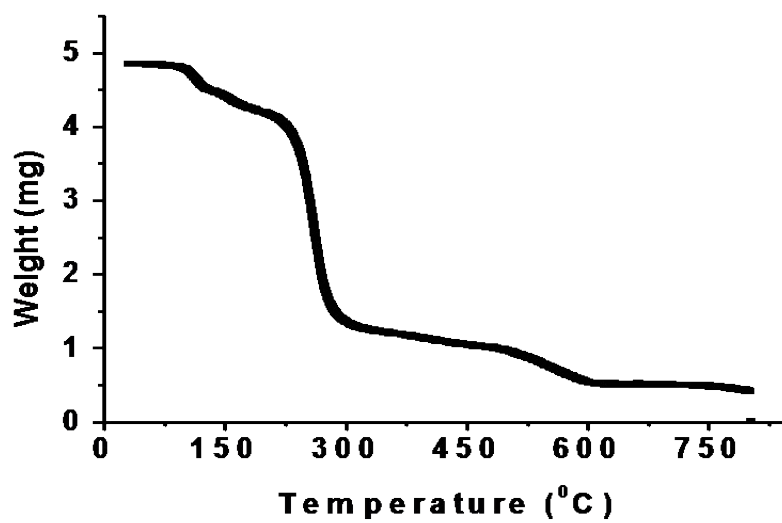

(a)

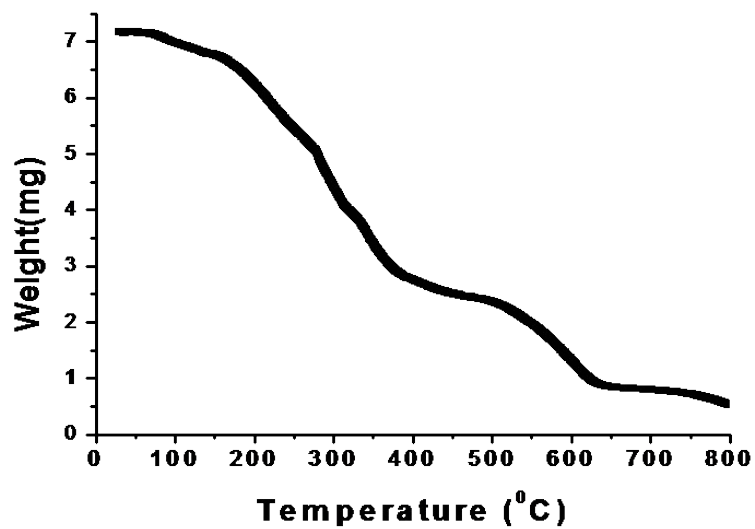

(b)

Fig. S8 TGA plot of (a) 1 and (b) 2

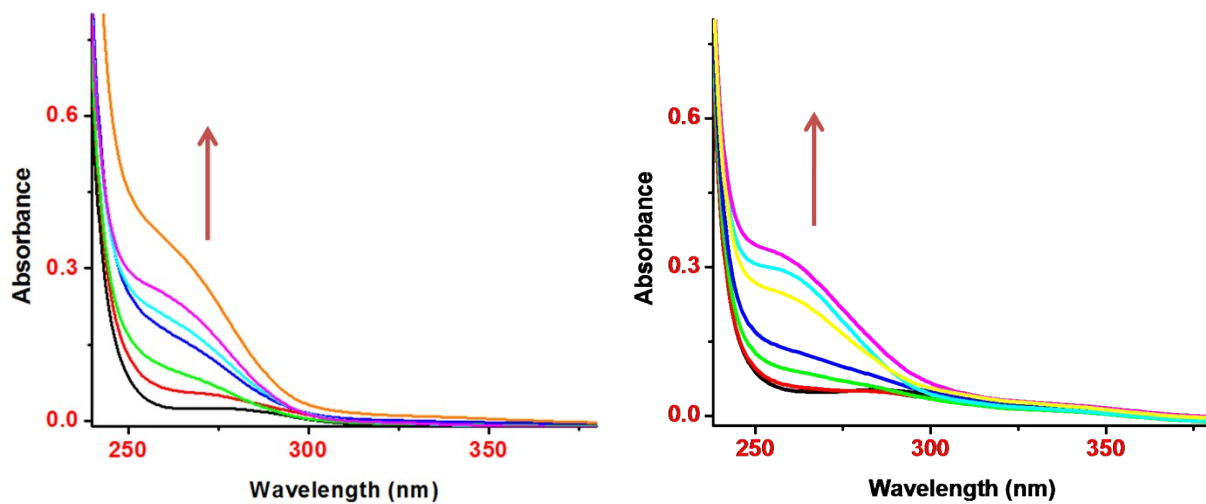

(a)

(b)

Fig. S9 Absorption spectra of complexes 1 (a) and 2 (b) in the presence of increasing ctDNA concentration.

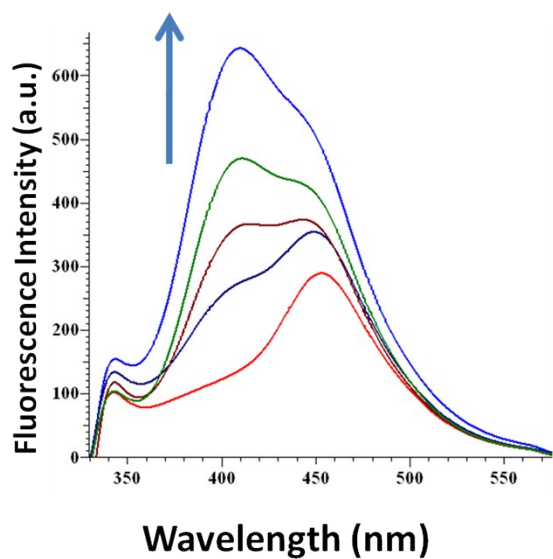

(a)

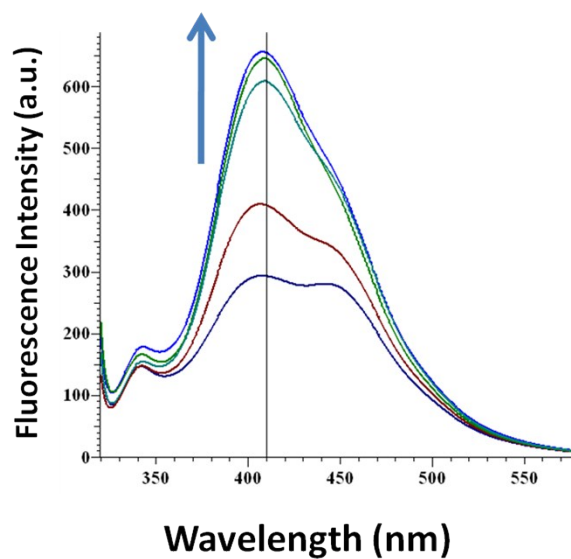

(b)

**Fig. S10** Emission spectra of (a) complex 1 and (b) complex 2 in TrisHCl buffer at pH 7.2 upon addition of ctDNA. Arrow indicates changes in intensity with increasing concentration of ctDNA.

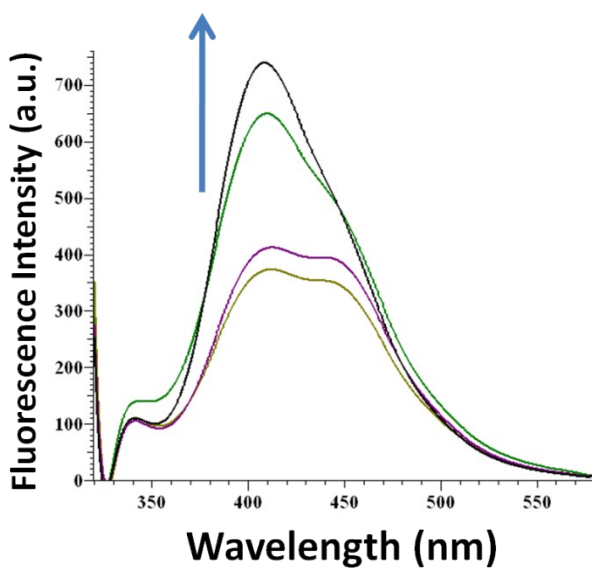

(a)

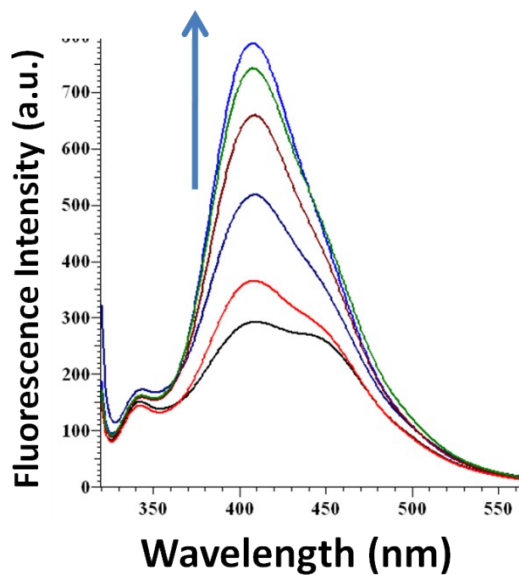

**Fig. S11** Emission spectra of **(a)** complex 1 and **(b)** complex 2 in Tris HCl buffer at pH 7.2 upon addition of tRNA. Arrow indicates changes in intensity with increasing concentration of tRNA.

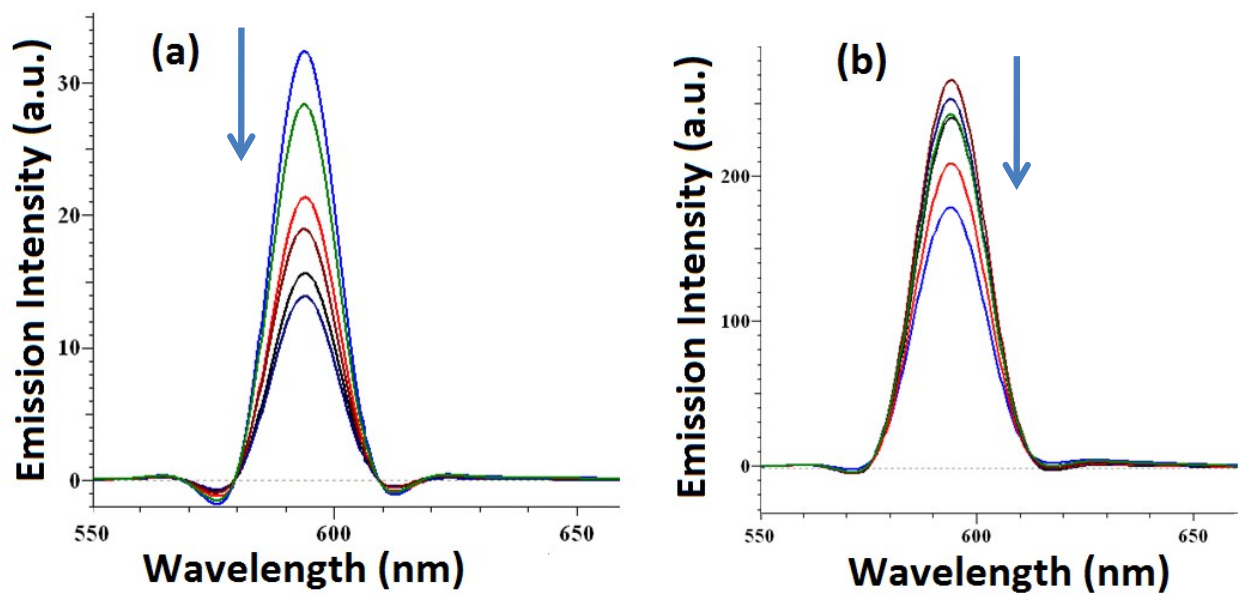

**Fig. S12** Emission titration spectra of the EB-tRNA system of complexes 1 and 2.

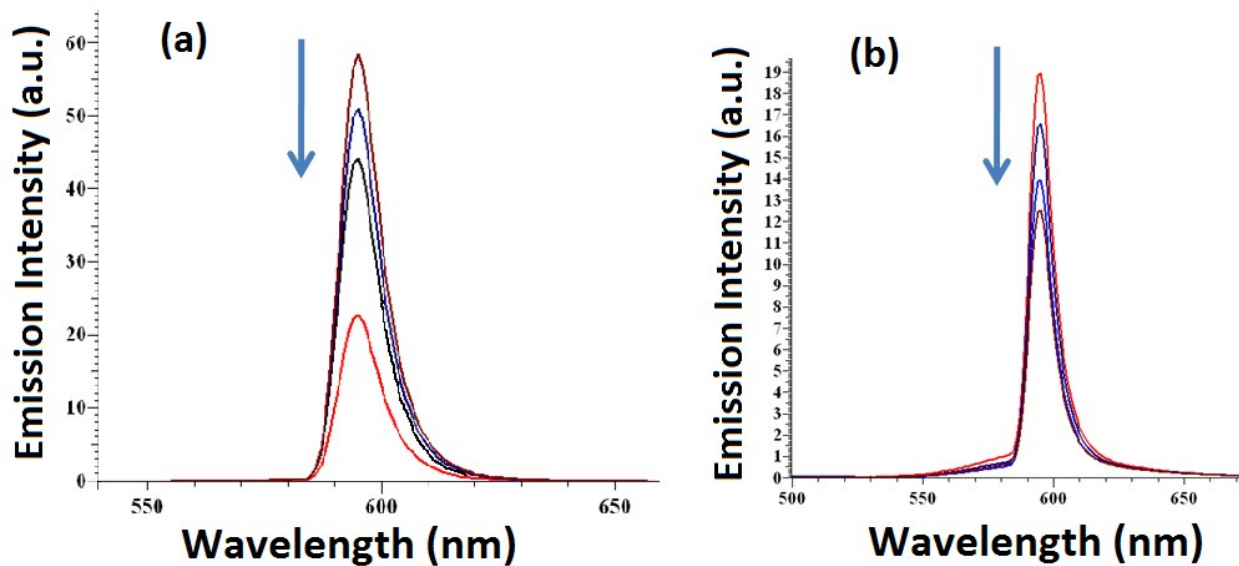

Fig. S13 Emission titration spectra of the EB–ctDNA system of complexes 1 and 2.

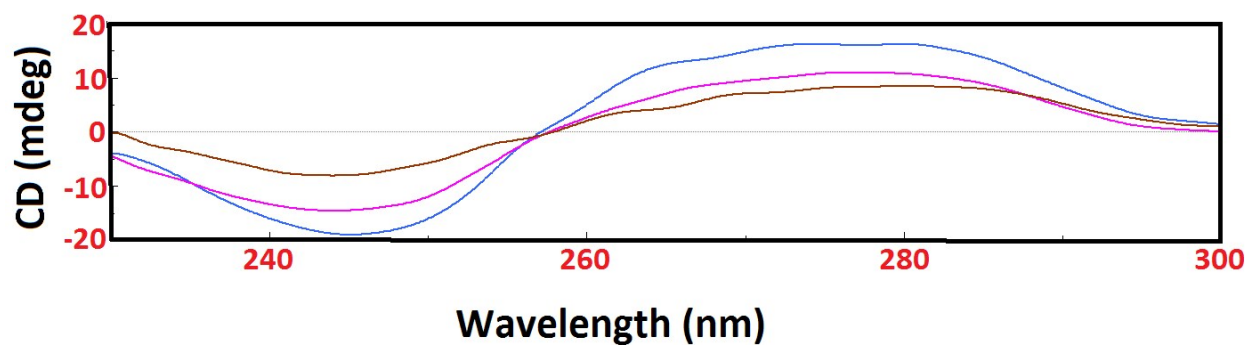

Fig. S14 CD spectra of ctDNA alone (pink), ctDNA + complex 1 (blue) and ctDNA + complex 2 (brown).

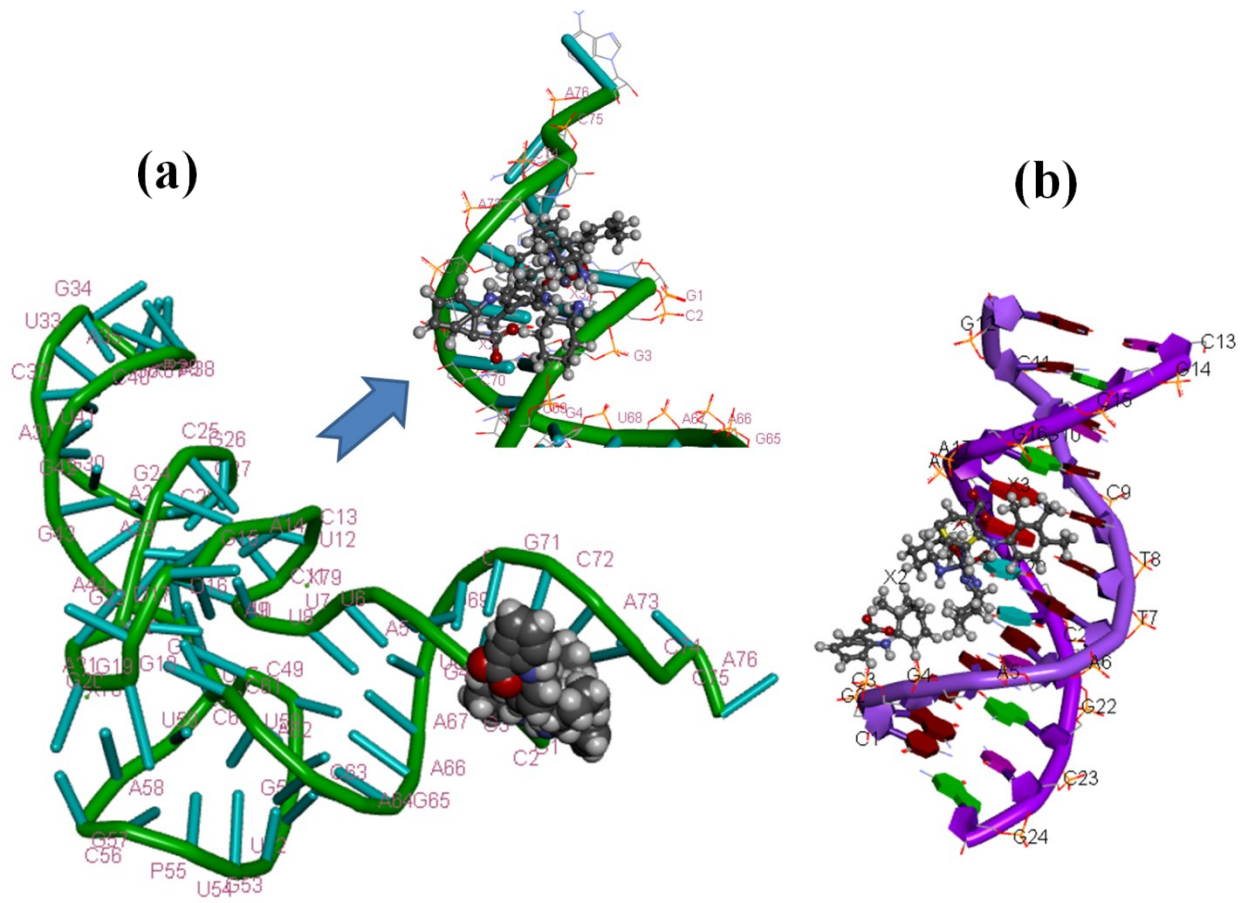

**Fig. S15** Molecular docked model of complex 2 with **(a)** tRNA **(b)** ctDNA

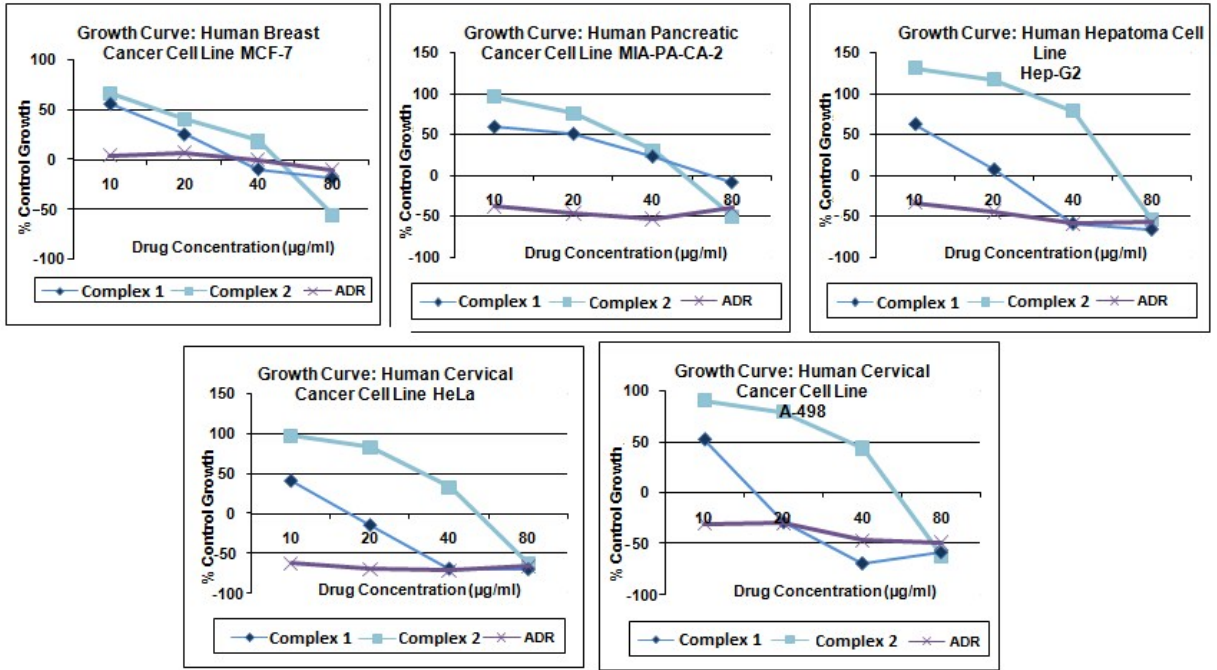

**Fig. S16** Growth curve showing % control growth versus drug concentration ( $\mu\text{g/ml}$ ) of 1 and 2 against different human carcinoma cell lines
